# Supplementary material
Source: publisher site journal article supplement (https://www.spandidos-publications.com/3201/downloadSupplementary)

Figure S1. Results of proteome profiler human protease array in pinosylvin-treated NPC cell lines. Determination of proteome profiler human protease array in (A) NPC-BM and (B) NPC-039 cells treated with 80  $\mu$ M pinosylvin for 24 h.

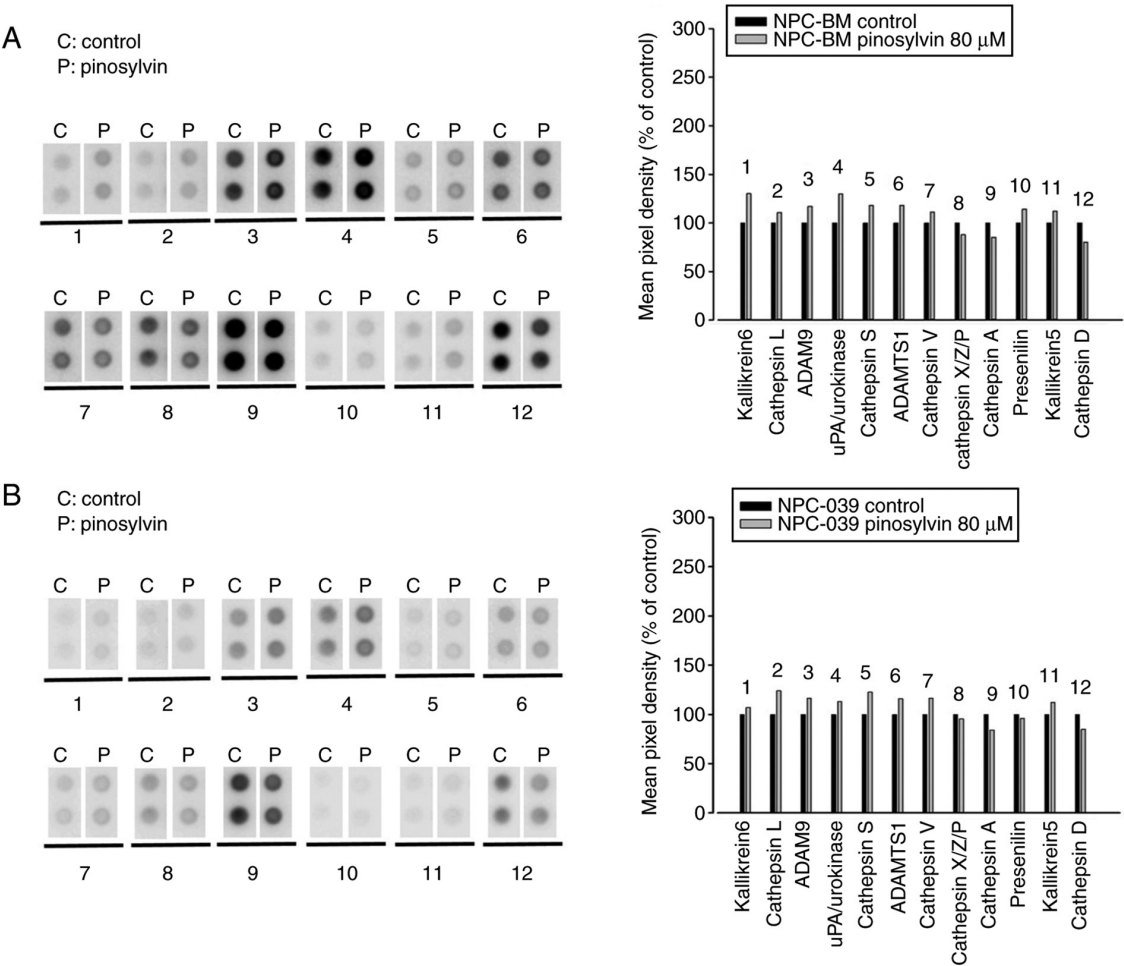

Supplement: Supplementary file 1 [file downloadSupplementary]
